# Supplementary material
Source: Springer Nature journal article supplement (https://www.springermedizin.de/resource/supplementary/10194_2014_1008_MOESM5_ESM.pdf/9423358)

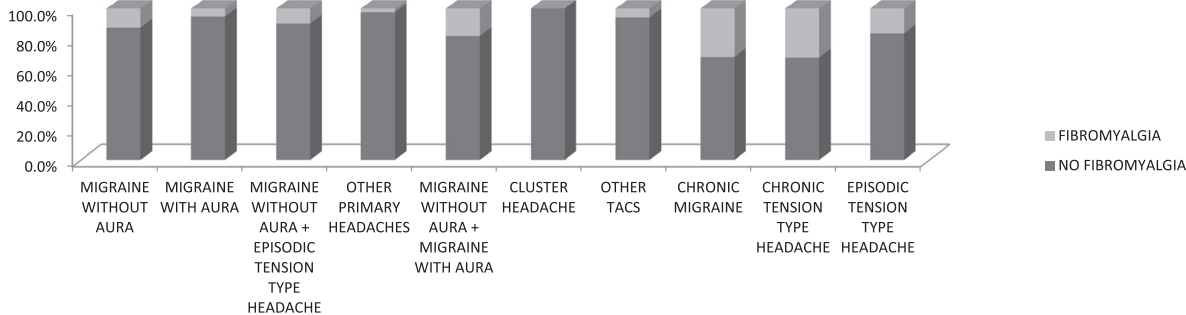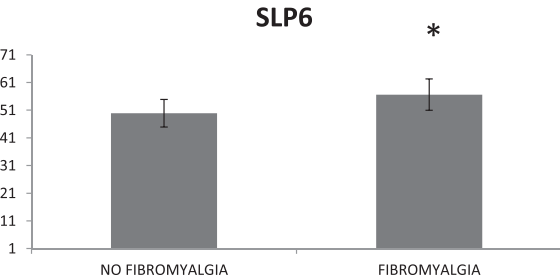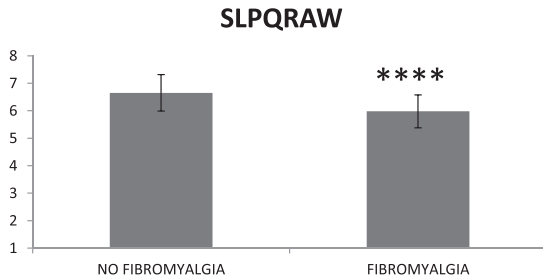

Supplement: MOESM5 [file 9423358]
